# Supplementary material
Source: Springer Nature journal article supplement (https://www.springermedizin.de/resource/supplementary/12985_2011_1759_MOESM1_ESM.pdf/9611010)

dsRNA: 11,282 bp

NUDIX domain

ORF1 1,975 aa

ORF2 (RdRp) 1,426 aa

5'

899

6856

6889

11169

3'

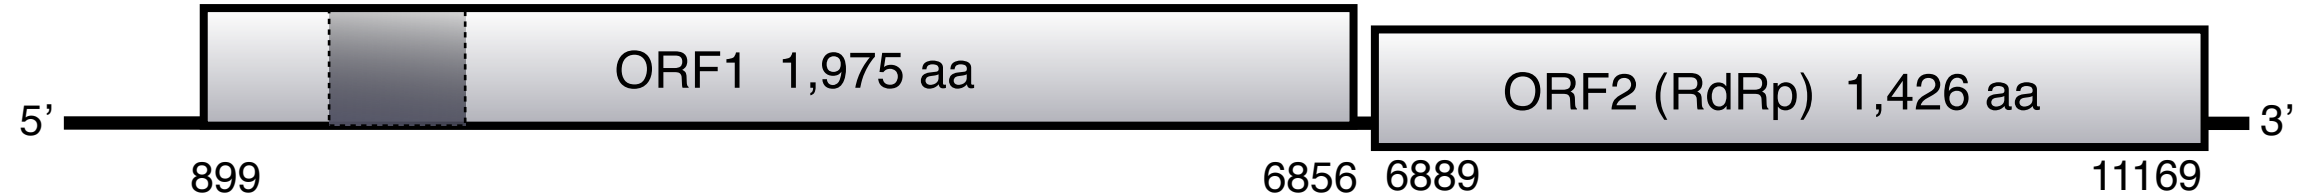

Supplement: MOESM1 [file 9611010]
